# Supplementary material for: Plant Feed Additives as Natural Alternatives to the Use of Synthetic Antioxidant Vitamins on Yield, Quality, and Oxidative Status of Poultry Products: A Review of the Literature of the Last 20 Years
Source: MDPI journal article supplement (doi:10.3390/antiox10050757), 2021-05-11
Supplement: s1 [file s1]

Table S1. Effects of plant feed additives on slaughter and meat traits in poultry

| PFA             | Dose extract<br>(% of the diet) | Vitamin<br>compared | Type of parameter                                 | Trait evaluated                          | Comparison to negative control:<br>effect (plant product dose) | Comparison to positive<br>control: effect (dose) | Period of study (d,<br>days, wk, week) | Reference                |
|-----------------|---------------------------------|---------------------|---------------------------------------------------|------------------------------------------|----------------------------------------------------------------|--------------------------------------------------|----------------------------------------|--------------------------|
| Grape<br>pomace | 1.5, 3, 6                       | E, 200 mg/kg        | Lipid oxidation                                   | MDA (1 d)                                | ↓13.64% (1.5%) ↓31.82% (3%)<br>↓4.91% (6%)                     | ↑26.7% (1.5%)                                    | 21 d                                   | Brenes et al.,<br>(2008) |
|                 |                                 |                     |                                                   | MDA (4 d)                                | ↓28.13% (3%)                                                   | ↑25% (1.5%)                                      |                                        |                          |
|                 |                                 |                     |                                                   | MDA (7d)                                 | ↓8.33% (1.5%) ↓27.8% (3%)<br>↓36.1% (6%)                       | NS                                               |                                        |                          |
|                 |                                 |                     | Organ weights                                     | Relative weight (RW) of<br>abdominal fat | ↑18.42% (1.5%)                                                 | NS                                               |                                        |                          |
|                 |                                 |                     |                                                   | RW of liver, pancreas                    | NS                                                             | NS                                               |                                        |                          |
|                 |                                 |                     |                                                   | RW of spleen                             | NS                                                             | ↑20% (1.5%)                                      |                                        |                          |
|                 |                                 |                     |                                                   | RLE duodenum                             | NS                                                             | ↑7.41% (1.5%)                                    |                                        |                          |
|                 |                                 |                     |                                                   | RLE of jejunum, ileum                    | NS                                                             | NS                                               |                                        |                          |
|                 |                                 |                     |                                                   | RLE of ceca                              | NS                                                             | ↑10.39% (1.5%)                                   |                                        |                          |
| Grape<br>pomace | 0.5, 1.5, 3                     | E, 200 mg/kg        | Lipid oxidation<br>during refrigerated<br>storage | MDA breast (1 d) breast                  | NS                                                             | ↑44.4% (1.5%)                                    | 21 d                                   | Goñi et al.,<br>(2007)   |

|                   |                                          |                                                                                 |                                 |                                               |                                         |                |                     |  |
|-------------------|------------------------------------------|---------------------------------------------------------------------------------|---------------------------------|-----------------------------------------------|-----------------------------------------|----------------|---------------------|--|
|                   |                                          |                                                                                 | MDA breast (4 d) breast         | ↓30% (1.5) ↓33.3% (3%)                        | ↑20.83% (0.5%)                          |                |                     |  |
|                   |                                          |                                                                                 | MDA breast (7 d) breast         | ↓19.15% (0.5%) ↓48.81% (1.5%)<br>↓42.55% (3%) | ↑32.14% (0.5%) ↓15.63% (3%)             |                |                     |  |
|                   |                                          |                                                                                 | MDA thigh (1 d) thigh           | NS                                            | ↑55.6% (0.5%) ↑66.7% (1.5%) ↑55.6% (3%) |                |                     |  |
|                   |                                          |                                                                                 | MDA thigh (4 d) thigh           | ↓23.3% (3%)                                   | ↑52.6% (0.5%) ↑42.1% (1.5%) ↑21.1% (3%) |                |                     |  |
|                   |                                          |                                                                                 | MDA thigh (7 d) thigh           | ↓13.95% (0.5%) ↓18.6% (1.5%)<br>↓30.23% (3%)  | ↑32.14% (0.5%) ↑25% (1.5%)              |                |                     |  |
|                   |                                          |                                                                                 | Hepatic vitamin E concentration | α-tocopherol in liver (21 d)                  | ↑29.52% (1.5%) ↑33.3% (3%)              | ↓19.77% (0.5%) |                     |  |
|                   |                                          |                                                                                 |                                 |                                               |                                         |                |                     |  |
| Grape polyphenols | 0.0025 (LGPP),0.0050 (MGPP), 0075 (HGPP) | E, 100 mg/kg (Control), replaced with the ratio 0.0025, 0.0050, 0.0075 % of GPP | DPPH in breast and in legs      | DPPH in breast                                | ↓4.76% (LGPP) ↓14% (MGPP) ↓8.36% (HGPP) | 35 d           | Iqbal et al.,(2014) |  |

|                   |                        |                                                                        |                 |                 |                                             |      |                      |
|-------------------|------------------------|------------------------------------------------------------------------|-----------------|-----------------|---------------------------------------------|------|----------------------|
|                   |                        |                                                                        |                 | DPPH in leg     | ↓6.24% (LGPP) ↓13.75% (MGPP) ↓8.52% (HGPP)  |      |                      |
|                   |                        | Organ weights                                                          |                 | Heart           | ↓29.2% (LGPP) ↓29.2% (MGPP) ↓32.82% (HGPP)  |      |                      |
|                   |                        |                                                                        |                 | Liver           | ↓3.48% (LGPP)                               |      |                      |
| Grape polyphenols | 0.0025, 0.0050, 0.0075 | E, 100 mg/kg (Control),replaced with the ratio 25, 50, 75 mg/kg of GPP | Lipid oxidation | TPC in breast   | ↑9.39% (LGPP) ↑21.12% (MGPP) ↑30.61% (HGPP) | 35 d | Iqbal et al., (2015) |
|                   |                        |                                                                        |                 | TPC in leg      | ↑8.35% (LGPP) ↑17.84% (MGPP) ↑26.49% (HGPP) |      |                      |
|                   |                        |                                                                        |                 | TBARS in breast | ↓9.1% (LGPP) ↓27.3% (MPP) ↓18.2% (HGPP)     |      |                      |
|                   |                        |                                                                        |                 | TBARS in leg    | ↓6.78% (LGPP) ↓23.73% (MPP) ↓19.5% (HGPP)   |      |                      |

|                                        |                                                                    |                                                    |                                         |                                                     |                                              |                             |      |                             |
|----------------------------------------|--------------------------------------------------------------------|----------------------------------------------------|-----------------------------------------|-----------------------------------------------------|----------------------------------------------|-----------------------------|------|-----------------------------|
| <b>Grape pomace</b>                    | 5, 7.5, 10                                                         | E, 200 mg/kg                                       | Carcass traits, organ weights           | Carcass, breast, thigh, liver, heart, abdominal fat | NS                                           | NS                          | 42 d | Ebrahimzadeh et al., (2018) |
| <b>Oregano plant (OP)</b>              | 3                                                                  | E (200 mg/kg) + C (1000 mg/kg)                     | Lipid oxidation of chicken meat         | TBARS in PM                                         | NS                                           | TN:160%; HS: ↑71.8%         | 42 d | Young et al., (2003)        |
|                                        |                                                                    |                                                    |                                         | TBARS in IL                                         | NS                                           | HS: ↑88.3%                  |      |                             |
|                                        |                                                                    |                                                    |                                         | TBARS in liver                                      | TN: ↓28.3% HS: ↓47.92%                       | NS                          |      |                             |
|                                        |                                                                    |                                                    | Meat color                              | L* in PM                                            | NS                                           | ↓1.18%                      |      |                             |
|                                        |                                                                    |                                                    |                                         | b* in PM                                            | NS                                           | ↑41,38%                     |      |                             |
|                                        |                                                                    |                                                    |                                         | b* in IL                                            | ↑56.7%                                       | ↑74.1%                      |      |                             |
|                                        |                                                                    |                                                    | Tocopherols concentration               | α-Tocopherol in PM                                  | NS                                           | ↓6.25%                      |      |                             |
|                                        |                                                                    |                                                    |                                         | γ-Tocopherol in PM                                  | NS                                           | NS                          |      |                             |
| <b>Oregano plant</b>                   | 0.5,1, 0.5+ 170 mg/kg of VitE (OR5E), 1+ 170 mg/kg of VitE (OR10E) | E, Flavomicin + lasalocid group (positive control) | Lipid oxidation of chicken meat         | MDA                                                 | ↓ (0.5%, 1%, OR5E, OR10E)                    | ↑ (0.5%, 1%)                | 42 d | Giannenas et al., 2005      |
| <b>Oregano essential oil (turkeys)</b> | 0.01, 0.02, 0.01 + 100 mg/kg of VitE                               | E, 200 mg/kg                                       | Lipid oxidation in refrigerated storage | MDA in refrigerated storage BM ( 0 d)               | ↓17.1% (0.01%) ↓32.49% (0.02%) ↓39.38% (OOE) | ↑22.85% (0.01%); =0.02%=OOE | 28 d | Botsoglou et al., (2003b)   |

|                                      |                                            |              |                                          |                                                                      |                                                  |                                              |      |                           |
|--------------------------------------|--------------------------------------------|--------------|------------------------------------------|----------------------------------------------------------------------|--------------------------------------------------|----------------------------------------------|------|---------------------------|
|                                      |                                            |              |                                          | MDA in refrigerated storage TM ( 0 d)                                | ↓ 22% (0.01%) ↓ 36.48% (0.02%)<br>↓ 41.35% (OOE) | ↑ 24.62% (0.01%);<br>=0.02%=OOE              |      |                           |
|                                      |                                            |              |                                          | MDA in refrigerated storage in BM and in TG after 3, 6, 9 days       | ↓ OO (0.01%)>OO (0.02%)                          | ↑ 24.62% (0.01%);<br>=0.02%=OOE              |      |                           |
|                                      |                                            |              |                                          |                                                                      |                                                  |                                              |      |                           |
| Oregano (OO) essential oil (turkeys) | 0.01, 0.02, 0.01 + 100 mg/kg of VitE (OOE) | E, 200 mg/kg | Lipid of turkey meat in long term frozen | MDA in frozen storage after 3 months in BM                           | ↓ OO (0.01%)>OO (0.02%)                          | =0.0200=OOE                                  | 28 d | Botsoglou et al., (2003a) |
|                                      |                                            |              |                                          | MDA 6 months BM                                                      | ↓ 0.0100>0.0200                                  | =0.0200=OOE                                  |      |                           |
|                                      |                                            |              |                                          | MDA 9 months BM                                                      | ↓ 0.0100>0.0200                                  | =0.0200=OOE                                  |      |                           |
|                                      |                                            |              |                                          | MDA after 7 d of refrigerated display (following 9 months of frozen) | ↓ 0.0100>0.0200                                  | =0.0200>OOE                                  |      |                           |
|                                      |                                            |              |                                          | α-tocopherol in BM (0 months)                                        | ↑ 20.95% (0.01%) ↑ 36.2% (0.02%) ↑ 71.43% (OOE)  | ↓ 42.27% (0.01%) ↓ 35% (0.02%) ↓ 18.2% (OOE) |      |                           |

|                                         |               |              |                                 |                                                         |                                                                              |                                                                            |      |                          |
|-----------------------------------------|---------------|--------------|---------------------------------|---------------------------------------------------------|------------------------------------------------------------------------------|----------------------------------------------------------------------------|------|--------------------------|
|                                         |               |              |                                 | $\alpha$ -tocopherol in BM (9 months)                   | $\uparrow$ 42.62% (0.01%) $\uparrow$ 72.13% (0.02%) $\uparrow$ 122.95% (OOE) | $\downarrow$ 32% (0.01%) $\downarrow$ 17.97% (0.02%)                       |      |                          |
|                                         |               |              |                                 | $\alpha$ -tocopherol TG (0 months)                      | $\uparrow$ 18.85% (0.01%) $\uparrow$ 40.98% (0.02%) $\uparrow$ 190.98% (OOE) | $\downarrow$ 32% (0.01%) $\downarrow$ 17.97% (0.02%)                       |      |                          |
|                                         |               |              |                                 | $\alpha$ -tocopherol TG (9 months)                      | $\uparrow$ 24.29% (0.01%) $\uparrow$ 60% (0.02%) $\uparrow$ 291.4% (OOE)     | $\downarrow$ 79.86% (0.01%) $\downarrow$ 74.1% (0.02%) $\downarrow$ 36.57% |      |                          |
| <b>Oregano essential oil (broilers)</b> | 0.005%, 0.01% | E, 200 mg/kg | Lipid oxidation                 | MDA in BM stored at -20 °C 3 months                     | $\uparrow$ 23.22% (0.005%) $\downarrow$ 38.76% (0.01%)                       | $\uparrow$ 60.78% (0.005%) $\uparrow$ 28.24% (0.01%)                       | 38 d | Botsoglou et al., (2003) |
|                                         |               |              |                                 | 6 months                                                | $\downarrow$ 19.2% (0.005%) $\downarrow$ 39.1% (0.01%)                       | $\uparrow$ 95.2% (0.005%) $\uparrow$ 47.2% (0.01%)                         |      |                          |
|                                         |               |              |                                 | 9 months                                                | $\downarrow$ 15.38% (0.005%) $\downarrow$ 41.23% (0.01%)                     | $\uparrow$ 50.46% (0.005%) $\uparrow$ 50.46% (0.01%)                       |      |                          |
| <b>Oregano oil (OO)</b>                 | 0.05%, 0.01%  | E, 200 mg/kg | Lipid oxidation of chicken meat | MDA on iron induced lipid oxidation in BM after 150 min | $\downarrow$ 0.05>0.1                                                        | $\uparrow$ 0.05>0.1                                                        | 38 d | Botsoglou et al., (2002) |

|                                                                                  |                                                                                  |                                                      |                                             |                                                                 |                |                            |    |                             |
|----------------------------------------------------------------------------------|----------------------------------------------------------------------------------|------------------------------------------------------|---------------------------------------------|-----------------------------------------------------------------|----------------|----------------------------|----|-----------------------------|
|                                                                                  |                                                                                  |                                                      |                                             | MDA on iron induced lipid oxidation in TM after 50 min          | ↓ (0.1%)       | ↑ (0.1%)                   |    |                             |
|                                                                                  |                                                                                  |                                                      |                                             | MDA on iron induced lipid oxidation in TM after 100 and 150 min | ↓ 0.5>0.1      | ↑ (0.1%)                   |    |                             |
| <hr/>                                                                            |                                                                                  |                                                      |                                             |                                                                 |                |                            |    |                             |
| Oregano plant (OP)                                                               | 0.5% (OP); 0.5% +190 mg/kg of VitC (OC), or + 170 mg/kg (OE), or with both (OCE) | Vitamin C (VitC), Vitamin E (VitE), Vit C+ VitE (CE) | Lipid oxidation during refrigerated storage | MDA in raw BM, TM (across 9 days)                               | ↓ OP=OC>OE=OCE | ↑ OP=OC>OE=OCE             |    | Florou-Paneri et al. (2006) |
|                                                                                  |                                                                                  |                                                      |                                             | MDA in cooked BM, TM                                            | ↓ OP (0.5%)    | ↓ OC=OCE; ↑ O=OC           |    |                             |
| <hr/>                                                                            |                                                                                  |                                                      |                                             |                                                                 |                |                            |    |                             |
| Oregano oil (CSB=crude soybean oil diet; ASO = acidulated soybean oil soapstock) | 0.01                                                                             | E, 10 mg/kg (E10), 100 mg/kg (E100)                  | FA profile of BM in both diets              | From C14:0 to C18:2,C20:4,SFA,MUFA,P UFA,PUFA:SFA               |                | NS                         | 42 | Avila-Ramos et al. (2012)   |
|                                                                                  |                                                                                  |                                                      |                                             | C18:3 (CSB)                                                     |                | E10:↑ 38.43% E100: ↑44.44% |    |                             |
|                                                                                  |                                                                                  |                                                      |                                             | C18:3 (ASO)                                                     |                | NS                         |    |                             |

|             |                                          |              |                                                               |                                                            |                      |                |      |                            |
|-------------|------------------------------------------|--------------|---------------------------------------------------------------|------------------------------------------------------------|----------------------|----------------|------|----------------------------|
|             |                                          |              | Lipid oxidation                                               | MDA in cooked meat strips, 9 d of storage (CSB)            |                      | ↓E10=E100      |      |                            |
|             |                                          |              |                                                               | MDA in cooked meat strips, 9 d of storage (ASO)            |                      | ↑E10>E100      |      |                            |
|             |                                          |              |                                                               | MDA in cooked meat patties, after 6 d of storage (ASO)     |                      | ↓E10 ↑E100     |      |                            |
|             |                                          |              |                                                               | MDA in cooked meat patties, after 6 d of storage (ASO)     |                      | ↑E10>E100      |      |                            |
| <hr/>       |                                          |              |                                                               |                                                            |                      |                |      |                            |
| Oregano oil | 0.01, 0.02, 0.01+100 mg/kg of VitE (OOE) | E, 200 mg/kg | Iron-induced lipid oxidation in chicken meat, liver and heart | MDA prior iron induced lipid oxidation in all tissues      | ↓ 0.0200=OOE P<0.05  | ↑0.0100 P<0.05 | 28 d | Papageorgiou et al. (2003) |
|             |                                          |              |                                                               | MDA after iron induced lipid oxidation in BM at all points | ↓ 0.0100 >0.0200>OOE | ↑0.0100 P<0.05 |      |                            |



|                                             |                                                            |                                                |                      |                                               |
|---------------------------------------------|------------------------------------------------------------|------------------------------------------------|----------------------|-----------------------------------------------|
|                                             | MDA after iron induced lipid oxidation in BM after 150 min |                                                | ↓ 0.0100 >0.0200>OOE | = 0.0200; ↓OOE                                |
|                                             | MDA after iron induced lipid oxidation in TM after 150 min |                                                | ↓ 0.0100 >0.0200>OOE | = 0.0200; ↓OOE                                |
|                                             | MDA after iron induced lipid oxidation in heart and liver  |                                                | similar trend        | similar trend                                 |
| Tocopherol concentration in differen tissue | BM                                                         | ↑15.24% (0.01%) ↑30.48% (0.02%) ↑71.43% (OOE)  |                      | ↓45% (0.01%) ↓37.73% (0.02%) ↓18.1% (OOE)     |
|                                             | TM                                                         | ↑14.75% (0.01%) ↑38.52% (0.02%) ↑190.98% (OOE) |                      | ↓75.95% (0.01%) ↓71.1% (0.02%) ↓39% (OOE)     |
|                                             | Liver                                                      | ↑39.9% (OOE)                                   |                      | ↓42.12% (0.01%) ↓40.56% (0.02%) ↓21.06% (OOE) |

|                           |           |              |                                                                                                             |                               |                                               |                                              |      |                          |
|---------------------------|-----------|--------------|-------------------------------------------------------------------------------------------------------------|-------------------------------|-----------------------------------------------|----------------------------------------------|------|--------------------------|
|                           |           |              |                                                                                                             | Heart                         | ↑17.86% (0.01%) ↑50.71% (0.02%) ↑487.1% (OOE) | ↓86.48% (0.01%) ↓82.7% (0.02%) ↓32.62% (OOE) |      |                          |
| Tomato pomace             | 30        | E, 242 mg/Kg | Lipid oxidation                                                                                             | TBARS after 4 days of storage | ↓23%                                          |                                              | 21 d | King and Zeidler, (2004) |
| Commercial essential oils | 0.05, 0.1 | E, 200 mg/kg | Lipid oxidation: MDA in thigh (TM) and breast muscle (BM) (both raw and heat treated (HT) tissue, Vitamin E | MDA TM (Raw tissue)           | ↓27.41% (0.05%) ↓47.9% (0.1%)                 | ↑83.14% (0.05%)                              | 42 d | Botsoglou et al. (2004)  |
|                           |           |              |                                                                                                             | MDA TM (HT tissue)            | ↓34.38% (0.05%) ↓56.17% (0.1%)                | ↑263.2% (0.05%) ↑142.6% (0.1%)               |      |                          |
|                           |           |              |                                                                                                             | MDA BM (Raw tissue)           | ↓22.4% (0.05%) ↓38.3% (0.1%)                  | ↑53.41% (0.05%)                              |      |                          |
|                           |           |              |                                                                                                             | MDA BM (HT tissue)            | ↓36.42% (0.05%) ↓62.3% (0.1%)                 | ↑136.6% (0.05%) ↑40.3% (0.1%)                |      |                          |
|                           |           |              |                                                                                                             | α-tocopherol TM (Raw tissue)  | NS                                            | ↓79.27% (0.05%) ↓79.63%(0.1%)                |      |                          |
|                           |           |              |                                                                                                             | α-tocopherol TM (HT tissue)   | NS                                            | ↓81.59% (0.05%) ↓80.9%(0.1%)                 |      |                          |

|  |  |  |  |  |                                      |    |                                  |  |  |
|--|--|--|--|--|--------------------------------------|----|----------------------------------|--|--|
|  |  |  |  |  | $\alpha$ -tocopherol BM (Raw tissue) | NS | ↓77.85% (0.05%)<br>↓77.17%(0.1%) |  |  |
|  |  |  |  |  | $\alpha$ -tocopherol BM (HT tissue)  | NS | ↓80.69% (0.05%) ↓78.74% (0.1%)   |  |  |

---

|                             |                                                                                              |                      |                                                 |          |                                                                                 |    |      |                       |
|-----------------------------|----------------------------------------------------------------------------------------------|----------------------|-------------------------------------------------|----------|---------------------------------------------------------------------------------|----|------|-----------------------|
| <b>Rosemary powder (RP)</b> | 0.5, 1.0 , 0.5 or 1+100 mg/kg of VitE (0.5RPE, 1RPE), or + 200mg/kg of VitE (0.5RPE2, 1RPE2) | E, 200 mg/kg (VitE2) | Lipid oxidation in BM stored at 4°C for 14 days | MDA d 4  | ↓21.82% (0.5RPE), ↓23.64% (0.5RPE2) ↓25.45% (1RPE2)                             | NS | 42 d | Rostami et al. (2017) |
|                             |                                                                                              |                      |                                                 | MDA d 7  | ↓11.94% (0.5RPE), ↓10.45% (0.5RPE2) ↓11.94% (1RPE2)                             | NS |      |                       |
|                             |                                                                                              |                      |                                                 | MDA d 14 | ↓20.73% (0.5%), ↓23.17% (0.5RPE) ↓26.83% (0.5RPE2); ↓19.5% (1%) ↓24.39% (1RPE2) | NS |      |                       |

|                              |        |                                       |                                                            |                                                                                                                                                                                                                                 |                     |                                         |      |                         |  |
|------------------------------|--------|---------------------------------------|------------------------------------------------------------|---------------------------------------------------------------------------------------------------------------------------------------------------------------------------------------------------------------------------------|---------------------|-----------------------------------------|------|-------------------------|--|
|                              |        |                                       | Carcass traits                                             | Right cecum weight, right cecum length, left cecum length; Full abdomen carcass weight, empty abdomen carcass weight, eviscerated carcass, breast weight, relative breast weight, drumsticks weight, relative drumsticks weight | NS                  | NS                                      |      |                         |  |
|                              |        |                                       |                                                            | Relative weight of right cecum                                                                                                                                                                                                  | NS                  | VitE2: ↑85.71% (0.5%)                   |      |                         |  |
| <b>Olive leaves (turkey)</b> | 0.5, 1 | E, 150 mg/kg (E150), 300 mg/kg (E300) | Lipid oxidation of turkey meat during refrigerated storage | TBARS across the entire storage period                                                                                                                                                                                          | ↓ 0.5OL>1OL P <0.05 | E150: ↓ 1OL<br>↑ 0.5OL>1OL E300: P<0.05 | 42 d | Botsoglou et al. (2010) |  |

|                                                 |                                           |              |                                           |         |                                                                                                             |                                         |                                                   |                     |      |                        |
|-------------------------------------------------|-------------------------------------------|--------------|-------------------------------------------|---------|-------------------------------------------------------------------------------------------------------------|-----------------------------------------|---------------------------------------------------|---------------------|------|------------------------|
| Rosemary plant (RP), rosemary volatile oil (RO) | R: 0.57, 0.86, 1.15; RO 0.01, 0.015, 0.02 | E, 200 mg/kg | Lipid oxidation (average of the 3 groups) | MDA d 1 | Bacteria count as meat: TVC (Total viable counts, LAB (Lactic acid bacteria), ENB (Enterobacteriaceae), PSY | Bacterial count at day 2 and afterwards | ↓ 0.5OL=1OL P <0.05                               | ↓ 0.5OL=1OL P <0.05 | 42 d | Yesilbag et al. (2011) |
|                                                 |                                           |              |                                           |         | Bacterial count at day 2 and afterwards (TVC, LAB, ENB, PSY)                                                | ↓ 0.5OL<1OL P <0.06                     | ↓ 0.5OL<1OL P <0.06                               |                     |      |                        |
|                                                 |                                           |              |                                           |         | TVC count at day 12 of storage (range)                                                                      | ↓19.74% (0.5%) ↓32.9% (1%)              | ↓19.74% (0.5%) ↓32.9% (1%) to both groups of VitE |                     |      |                        |
|                                                 |                                           |              |                                           |         | LAB count at day 12 of storage (range)                                                                      | ↓28.47% (0.5%) ↓40.15% (1%)             | ↓28.47% (0.5%) ↓40.15% (1%)                       |                     |      |                        |
|                                                 |                                           |              |                                           |         | ENB count at day 12 of storage (range)                                                                      | ↓21.62% (0.5%) ↓36.49% (1%)             | ↓21.62% (0.5%) ↓57.26% (1%)                       |                     |      |                        |
|                                                 |                                           |              |                                           |         | PSY count at day 12 of storage (range)                                                                      | ↓21.62% (0.5%) ↓36.48% (1%)             | ↓21.62% (0.5%) ↓36.48% (1%)                       |                     |      |                        |
|                                                 |                                           |              |                                           |         |                                                                                                             |                                         |                                                   |                     |      |                        |



|                                       |                                                                  |                                       |                                                            |                                                                 |                                 |                                             |          |                         |
|---------------------------------------|------------------------------------------------------------------|---------------------------------------|------------------------------------------------------------|-----------------------------------------------------------------|---------------------------------|---------------------------------------------|----------|-------------------------|
| Rosemary leaves and olive leaves (OL) | 1                                                                | E, 150 mg/kg (E150), 300 mg/kg (E300) | Lipid oxidation of turkey meat during refrigerated storage | MDA in raw BM stored at 4°C for up to 12 days (all time points) | ↓RL>OL P <0.05                  | E150: ↓RL>OL P<0.05:<br>E300: ↑RL>OL P<0.05 | 42 d     | Govaris et al. (2010)   |
|                                       |                                                                  |                                       | Microbial growth                                           | TVC d 12                                                        | ↓16.13% (RL) ↓32.9% (OL)        | ↓16.13% (RL) ↓32.9% (OL)                    |          |                         |
|                                       |                                                                  |                                       |                                                            | PSY d 12                                                        | ↓17.57% (RL) ↓40.54% (OL)       | ↓17.57% (RL) ↓40.54% (OL)                   |          |                         |
|                                       |                                                                  |                                       |                                                            | LAB d 12                                                        | ↓15.33% (RL) ↓38.69% (OL)       | ↓15.33% (RL) ↓38.69% (OL)                   |          |                         |
|                                       |                                                                  |                                       |                                                            | ENB d 12                                                        | ↓21.37% (RL) ↓40.17% (OL)       | ↓21.37% (RL) ↓40.17% (OL)                   |          |                         |
| Rosemary leaves (RL)                  | 0.5 (0.5RL), 1 (1RL), 0.5 (0.5RLE) or 1 (1RLE)+300 mg/kg of VitE | E, from 10 to 300 mg/kg               | Lipid oxidation                                            | MDA in raw meat samples                                         | ↓>0.5RL>1RL>0.5RLE=1RLE         | ↑>0.5RL>1RL>0.5RLE=1RLE                     | 16 weeks | Botsoglou et al. (2007) |
|                                       |                                                                  |                                       |                                                            | α-tocopherol in BM                                              | ↑185.7% (0.5RLE) ↑177.4% (1RLE) | ↓59.52% (0.5RL) ↓61% (1RL)                  |          |                         |
|                                       |                                                                  |                                       |                                                            | α-tocopherol in TM                                              | ↑453% (0.5RLE) ↑442.6% (1RLE)   | ↓33.54% (0.5RL) ↓79.81% (1RL)               |          |                         |

|                                                                                        |                                                                                                                                            |                                                                                                         |                                                                                              |                  |                                                     |                                                                         |      |                            |
|----------------------------------------------------------------------------------------|--------------------------------------------------------------------------------------------------------------------------------------------|---------------------------------------------------------------------------------------------------------|----------------------------------------------------------------------------------------------|------------------|-----------------------------------------------------|-------------------------------------------------------------------------|------|----------------------------|
| Plant extract:<br>Rosemary (RO), Green tea (GT), Grape seed (GS), Tomato extracts (TO) | 0.01, 0.02 each, other combinations                                                                                                        | E, 200 mg/kg along with 300 mg/kg of synthetic antioxidants, 300 mg/kg of synthetic antioxidants (SYNT) | Fatty acid profile (FAP); Lipid oxidation, Protein oxidation; α-tocopherol content in muscle | TBARS            |                                                     | ↑ all                                                                   | 42 d | Smet et al. (2008)         |
| Oregano (OO) and rosemary (RO) essential oils                                          | 0.015OO: 0.015%;<br>0.03OO: 0.03%;<br>0.015RO: 0.015%;<br>0.03RO: 0.03%;<br>0.0075OO+0.0075RO: both 0.0075%;<br>0.015OO150+0.015RO: 0.015% | E, 200 mg/kg                                                                                            | Lipid oxidation: MDA in stored meat enriched with n-3 PUFAs                                  | MDA in BM (d 0)  | from ↓67.26% (0.015OO) to ↓85.84% (0.015OO+0.015RO) | ↑ 60.87% (0.015OO)<br>↑34.78% (0.03OO) ↑26.1% (0.03RO)                  | 21 d | Basmacioglu et al., (2004) |
|                                                                                        |                                                                                                                                            |                                                                                                         |                                                                                              | MDA in BM (d 15) | from ↓85.3% (0.015OO) to ↓93.96% (0.015OO+0.015RO)  | ↑ 17.74% (0.015OO) ↓37.1% (0.075OO+0.075RO)<br>↓51.6% (0.015OO-0.015RO) |      |                            |
|                                                                                        |                                                                                                                                            |                                                                                                         |                                                                                              | MDA in TM (d 0)  | from ↓ 64.8% (0.015OO) to ↓84% (0.015OO+0.015RO)    | ↑ 51.72% (0.015OO) ↑31% (0.03OO) ↓31.03% (0.015OO+0.015RO)              |      |                            |



|                        |                                                                                             |                                                                                                       |
|------------------------|---------------------------------------------------------------------------------------------|-------------------------------------------------------------------------------------------------------|
| MDA in TM (d 15)       | from ↓84.97% (0.01500) to<br>↓93.79% (0.01500+0.015RO)                                      | ↓10.45% (0.015RO)<br>↓17.91% (0.03RO)<br>↓38.81%<br>(0.07500+0.075RO)<br>↓53.73%<br>(0.01500+0.015RO) |
| α-tocopherol BM (d o)  | ↑ 8% (0.03RO)                                                                               | ↓ from 80.99% (0.03RO) to<br>83.1% (0.01500)                                                          |
| α-tocopherol BM (d 15) | ↑ 400% (0.015RO) ↑ 500%<br>(0.03RO) ↑ 600%<br>(0.07500+0.075RO) ↑ 700%<br>(0.01500+0.015RO) | ↓ from 99.2% (0.01500<br>and 0.01500) to 93.94%<br>(0.01500+ 0.015RO)                                 |
| α-tocopherol TM (d 0)  | ↑10% (except 0.015RO)                                                                       | ↓ from 92.57% (except<br>0.015RO) to 93.24%<br>(0.01500+ 0.015RO)                                     |
| α-tocopherol TM (d 15) | ↑400% (0.03RO,<br>0.07500+0.075RO) ↑600%<br>(0.01500+0.015RO)                               | ↓ from 99.1% (0.01500,<br>0.0300) to 93.58%<br>(0.01500+0.15RO)                                       |

---

Rosemary leaves (RL), rosehip fruits (RF), chokeberry pomace (CP), entire nettle (EN)

2.5 of each alternative

E, 200 mg/kg

Slaughter traits (carcass weight, dressing %, organs/kg carcass)

Pancreas weight

↑ 18.2% (RL)

↑ 21.46% (RL)

28 d

Loetscher et al. (2013)

Liver weight

↑ 27.56% (RL) ↑15.1% (EN)

↑ 18.6% (RL)

Color of skin, breast, liver

Skin color yellowness

↑29.63% (RL) ↑90.74% (EN)

↑77.59% (EN)

Liver color b\*

↑33.69% (EN)

↑26.83% (EN)

Tocopherols in breast meat

α

↑68.13% (RL) ↑92.8% (EN)

↓57.4% (RL) ↓67.85% (RF)  
↓69.6% (CP) ↓51.15% (EN)

γ

NS

↓44.91% (CP)

Total

↑62% (RL) ↑84.42% (EN)

↓56.44% (RL) ↓66.1% (RF)  
↓68.5% (CP) ↓50.42% (EN)

Lipid oxidation of  
meat: breast meat  
tocopherols,  
TBARS, resistance  
against oxidation  
(induction time) of  
the abdominal fat

TBARS in breast meat (d  
0)

↓6.65% (RF) ↓29.3% (CP)

NS

TBARS in breast meat (d  
3)

NS

NS

TBARS in breast meat (d  
6)

NS

↑496.6% (RF) ↑909.2%  
(EN)

TBARS in breast meat (d  
9)

↓57.19% (RL)

↑335.6% (RF) ↑370.53%  
(CP) ↑590.86% (EN)

Resistance against  
oxidation of the  
abdominal fat

↑32.62% (RL)

↓42.46% (RL) ↓54.1% (RF)  
↓49.65% (CP) ↓55.7% (EN)

---

|                    |           |              |                                                                                                                             |           |                             |                                |      |                        |
|--------------------|-----------|--------------|-----------------------------------------------------------------------------------------------------------------------------|-----------|-----------------------------|--------------------------------|------|------------------------|
| Hesperidin<br>(HE) | 0.15, 0.3 | E, 200 mg/kg | Cold CW, internal organ weights, pH24, Shear values, intramuscular fat, cooking loss, color. Lipid oxidation (MDA), Meat pH | Cold CW   | NS                          | NS                             | 40 d | Simitzis et al. (2011) |
|                    |           |              |                                                                                                                             | pH24      | NS                          | ↓0.99% (0.3%)                  |      |                        |
|                    |           |              |                                                                                                                             | Color L*  | NS                          | ↑4.48% (0.15%)                 |      |                        |
|                    |           |              |                                                                                                                             | Color a*  | NS                          | ↓15.9% (0.15%)                 |      |                        |
|                    |           |              |                                                                                                                             | Color b*  | NS                          | ↓8.63(0.15%) ↓6.36% (0.3%)     |      |                        |
|                    |           |              |                                                                                                                             | MDA (1 d) | NS                          | ↑109.8% (0.15%) ↑77.99% (0.3%) |      |                        |
|                    |           |              |                                                                                                                             | MDA (3d)  | ↓35.37% (0.3%)              | ↑215.2% (0.15%) ↑139.7% (0.3%) |      |                        |
|                    |           |              |                                                                                                                             | MDA (6 d) | ↓31.2% (0.15%) ↓40% (0.3%)  | ↑399% (0.15%) ↑335.2% (0.3%)   |      |                        |
|                    |           |              |                                                                                                                             | MDA (9d)  | ↓37.8%(0.15%) ↓46.5% (0.3%) | ↑361.3% (0.15%) ↑299.6% (0.3%) |      |                        |

---

|                                                                |                   |                                                      |                                                 |              |                                           |                    |      |                                   |
|----------------------------------------------------------------|-------------------|------------------------------------------------------|-------------------------------------------------|--------------|-------------------------------------------|--------------------|------|-----------------------------------|
| Coneflower (CE), Thyme (TE), Sage (SE), Marigold extracts (ME) | 0.056%, 0.002% ME | E;<br>BHT+EQ+BHA, (SYNT1);<br><br>xantophyll, (SYNT2 | Slaughter traits;<br>Selected fatty acids of BM | C18:0        | ↑20.1% (SE),                              | NS                 | 20 d | Koreleski and Swiatkiewicz (2007) |
|                                                                |                   | C18:1                                                |                                                 | ↓12.75% (SE) | SYNT2: ↓11.56% (SE)                       |                    |      |                                   |
|                                                                |                   | C18:3                                                |                                                 | ↑550% (SE)   | SYNT2: ↓24.55% (SE)                       |                    |      |                                   |
|                                                                |                   | C20:4                                                |                                                 | ↑44.72% (SE) | SYNT1: 31.19%; SYNT2: ↑60% (SE)           |                    |      |                                   |
|                                                                |                   | C22:6 n-3 (DHA)                                      |                                                 | ↑59.58% (SE) | SYNT2: ↑%(SE)                             |                    |      |                                   |
|                                                                |                   | PUFA n-3                                             |                                                 | NS           | SYNT2: ↑33.97%(SE)                        |                    |      |                                   |
|                                                                |                   | n-6/ n-3                                             |                                                 | NS           | SYNT1: ↓24.46% SYNT2: ↓23.44%(SE)         |                    |      |                                   |
|                                                                |                   | Lipid oxidation                                      |                                                 | TBARS        | ↑36.48% (ME)                              | ViTE: ↑33.68% (ME) |      |                                   |
|                                                                |                   | Vitamin E                                            |                                                 | NS           | VitE: ↓72.1% (CE) ↓70.7% (TE) ↓68.7% (ME) |                    |      |                                   |

|                    |                         |              |                 |                                                          |                                     |                 |                                                |                     |
|--------------------|-------------------------|--------------|-----------------|----------------------------------------------------------|-------------------------------------|-----------------|------------------------------------------------|---------------------|
|                    |                         |              |                 | Sensory properties                                       | Flavour                             | NS              | SYNT2: ↑10.34% (CE)<br>↑9.61% (TE) ↑7.64% (ME) |                     |
|                    |                         |              |                 |                                                          | Taste                               | NS              | SYNT2: ↑9.5% (CE) ↑13% (TE) ↑11.75% (SE)       |                     |
| Tea catechins (TC) | 0.005, 0.01, 0.02, 0.03 | E, 200 mg/kg | Lipid oxidation | TBARS in BM after incubation of 100 min                  | ↓ 0.02TC=0.03TC; ↑0.005TC<br>P<0.05 |                 | 42 d                                           | Tang et al., (2000) |
|                    |                         |              |                 | TBARS in BM after incubation of 200 min                  | ↓ 0.02TC=0.03TC; ↑0.005TC<br>P<0.06 | ↓ 0.02TC=0.03TC |                                                |                     |
|                    |                         |              |                 | TBARS in TM after incubation of 50 min and 100 min in TM | ↓ 0.02TC=0.03TC=0.01TC P<0.05       |                 |                                                |                     |
|                    |                         |              |                 | TBARS in TM after incubation of 200 min                  | ↓0.02TC=0.03TC P<0.05               | ↓0.03TC         |                                                |                     |
|                    |                         |              |                 | TBARS in liver up to 200 min                             | ↓0.03TC P<0.05                      |                 |                                                |                     |
|                    |                         |              |                 | TBARS in liver 200 min                                   |                                     |                 |                                                |                     |

|                                                                              |                                          |                                           |                                                                                |                                                  |                                              |                                                                               |      |                       |
|------------------------------------------------------------------------------|------------------------------------------|-------------------------------------------|--------------------------------------------------------------------------------|--------------------------------------------------|----------------------------------------------|-------------------------------------------------------------------------------|------|-----------------------|
| <b>Tea catechins</b>                                                         | 0.005, 0.01, 0.02, 0.04                  | E, 200 mg/kg                              | Iron-induced lipid oxidation in chicken meat, liver and heart stored at -20° C | TBARS in BM (3 months), similar trend afterwards | ↓62.79% (0.02%)                              | ↓9.1% (0.03%) P<0.05;<br>↑300% (0.005%) ↑181.(& (0.01%) ↑45.% (0.02%) P<0.001 | 42 d | Tang et al., (2001)   |
|                                                                              |                                          |                                           |                                                                                | TBARS in TM (3 months)                           | Similar results                              | Similar reuslts                                                               |      |                       |
| <b>Tomato skin (TS), orange peel (OE), green tea leaves (GTL) (broilers)</b> | 200 mg/kg each                           | E, 200 mg/kg                              | Slaughter traits, meat traits, Lipid oxidation                                 | TBARS (average) in BM                            | ↑39.13% (TS) ↑19.57% (OE)                    | ↑56.1% (TS) ↑34.2% (OE)                                                       | 56 d | Marzoni et al. (2014) |
|                                                                              |                                          |                                           |                                                                                | TBARS (average) in TM                            | ↓55.18% (TS) ↓62.44%(OE)<br>↑24.87% (GTL)    | ↑212.99% (GTL)                                                                |      |                       |
| <b>Rosemary leaves (RL) , orange peel (OP)(ducks)</b>                        | 200 mg/kg each                           | E, 200 mg/kg                              | Slaughter traits, meat traits, Lipid oxidation                                 | TBARS (average) in BM                            | ↓46.34% (OE) ↓46.78% (RL)                    | ↑287.5% (OE) ↑95.83% (RL)                                                     | 69 d | Marzoni et al. (2014) |
|                                                                              |                                          |                                           |                                                                                | TBARS (average) in TM                            | ↓33.1% (OE) ↓66.2% (RL)                      | ↑86.2% (OE) ↑84.62% (RL)                                                      |      |                       |
| <b>Sweet chestnut wood extract (SCW)</b>                                     | 0.3% or with VitE (SCWE), CP: diet, CLIN | E, 85 mg/kg (85VitE), 200 mg/kg (200VitE) | Fatty acid composition of BM                                                   | Total fat                                        | CP: ↑78.49% (0.3%), ↑97.85% (SCWE); CLIN: NS | NS                                                                            | 25 d | Voljc et al. (2013)   |

|           |                                                                             |                                                                                  |
|-----------|-----------------------------------------------------------------------------|----------------------------------------------------------------------------------|
| C18:1 n-9 | CP: ↑39.21% (0.3%), ↑45% (SCWE); CLIN: NS                                   | NS                                                                               |
| C18:2 n-6 | CP: ↑104.8% (0.3%), ↑129% (SCWE); CLIN: NS                                  | NS                                                                               |
| C20:4 n-6 | CP: ↓30.65% (0.3%), ↓31.5% (SCWE); CLIN: NS                                 | NS                                                                               |
| C20:5 n-3 | CP: ↑561.7% (0.3%), ↑574.65% (SCWE); CLIN: ↑19.91% (0.3%)<br>↑22.27% (SCWE) | 85VitE: ↑8.3% (0.3%)<br>↑10.42% (SCWE); 200VitE:<br>↑13.2% (0.3%) ↑15.42% (SCWE) |
| C22:6 n-3 | CP: ↑54.23% (0.3%), ↑56% (SCWE); CLIN: NS                                   | NS                                                                               |
| n-3 PUFA  | CP: ↑1089.5% (0.3%), ↑1399.76% (SCWE); CLIN: NS                             | NS                                                                               |



|                         |                                       |                                         |                                                                   |                           |                                          |                                                  |                              |
|-------------------------|---------------------------------------|-----------------------------------------|-------------------------------------------------------------------|---------------------------|------------------------------------------|--------------------------------------------------|------------------------------|
|                         |                                       |                                         |                                                                   | n-6 PUFA                  | CP: ↑74.6%(SCWE)                         | NS                                               |                              |
|                         |                                       |                                         |                                                                   | n-6/n-3                   | CP:↓89.1% (0.3%) ↓89.1% (SCWE)           |                                                  |                              |
|                         |                                       |                                         | Meat quality characteristics                                      | Lightness d 7             | NS                                       | 85VitE: ↑7.11% (SCWE)                            |                              |
|                         |                                       |                                         |                                                                   | Yellowness (b*) d 1       | CP: ↑109.9% (SCWE); CLIN: ↑49.5&% (SCWE) | 85 VitE: ↑50.2% (SCWE)                           |                              |
|                         |                                       |                                         |                                                                   | Yellowness (b*) d 7       | CP: ↑31% (SCWE)                          | 85VitE: ↑19.65% (SCWE)                           |                              |
|                         |                                       |                                         | Lipid oxidation                                                   | MDA in raw BM             | CP: ↑505.3% (SCWE)                       | 85 VitE: ↑225% (SCWE)                            |                              |
|                         |                                       |                                         |                                                                   | MDA in heat stress BM     | CP: ↑172.69% (SCWE); CLIN: ↓47.3% (SCWE) | 85 VitE: ↑50.1% (0.3%)<br>200VitE ↑154.4% (0.3%) |                              |
| Polyphenol product (PP) | 0.01%+100 mg (PPE) of VitE;0.02% (PP) | E, 100 mg/kg (100VE), 200 mg/kg (200VE) | Carcass quality , structure gastrointestinal tract, digesta in pH | BM content of carcass (%) | HS: ↑7.4% (PPE)                          | 100VE: ↑6.63% (PPE)                              | Mazur-Kusnirek et al., 2019a |
|                         |                                       |                                         | Meat quality characteristics                                      | Colour, b*                | TN: ↓11.76% (PPE) ↓13.18% (PP)           | NS                                               |                              |

|           |                   |                                |    |
|-----------|-------------------|--------------------------------|----|
|           | Natural drip loss | HS: ↓39.87% (PPE) ↓37.34% (PP) |    |
|           | WHC               | HS: ↓28.71% (PPE) ↓24.95% (PP) | NS |
|           | Crude ash         | TN: ↑9.82% (PP) HS:↑6%(PP)     | NS |
| FAC of BM | PUFA              | HS: ↑7.7% (PPE) ↑8.62% (PP)    | NS |
|           | n-6               | HS: ↑6.54% (PPE) ↑7% (PP)      | NS |
|           | C18:1 n-9         | TN:↑41.2%; HS:↓2.84% (PP)      | NS |
|           | C20:2             | HS: ↑27.78% (PPE) ↑22.2% (PP)  | NS |
|           | C20:4             | HS: ↑53.9% (PPE) ↑51.56% (PP)  | NS |
|           | C20:5             | HS: ↑93.3% (PP)                | NS |

|                               |      |              |                                               |                                            |                                     |         |         |                     |
|-------------------------------|------|--------------|-----------------------------------------------|--------------------------------------------|-------------------------------------|---------|---------|---------------------|
|                               |      |              |                                               | C22:0                                      | HS: ↑34.48% (PPE), HS: ↑34.48% (PP) | NS      |         |                     |
|                               |      |              |                                               | C22:5                                      | HS: ↑40.82% (PPE), HS: ↑40.82% (PP) | NS      |         |                     |
| Oregano aqueous extract (OaE) | 0.02 | E, 150 mg/kg | Meat quality characteristics of breast muscle | pH45', pH24                                | NS                                  | NS      | 42      | Forte et al. (2018) |
|                               |      |              |                                               | Color parameters                           | NS                                  | NS      |         |                     |
|                               |      |              |                                               | Drip, cooking loss, shear force            | NS                                  | NS      |         |                     |
|                               |      |              |                                               | Moisture, protein, fat, ashes              | NS                                  | NS      |         |                     |
|                               |      |              |                                               | Lipid oxidation                            | TPC                                 | ↑26.67% | ↑32.56% |                     |
|                               |      |              |                                               |                                            | ORAC <sub>FL</sub>                  | ↑19.42% | NS      |                     |
|                               |      |              | FAC of BM                                     | NS                                         | NS                                  | NS      |         |                     |
|                               |      |              | CLA isomers and PUFA n-3 content              | NS                                         | NS                                  | NS      |         |                     |
|                               |      |              | Attributes of meat (blind)                    | Appearance, texture, taste, overall liking | NS                                  | NS      |         |                     |
|                               |      |              | Attributes of meat (informed )                | Appearance                                 | ↑16.55%                             | ↑7.55%  |         |                     |

|                   |     |             |                                               |                                              |                                 |         |        |                         |
|-------------------|-----|-------------|-----------------------------------------------|----------------------------------------------|---------------------------------|---------|--------|-------------------------|
|                   |     |             |                                               | Texture                                      | ↑16.43%                         | NS      |        |                         |
|                   |     |             |                                               | Taste                                        | ↑22.12%                         | ↑13.41% |        |                         |
|                   |     |             |                                               | Overall liking                               | ↑23.11%                         | ↑11.08% |        |                         |
|                   |     |             |                                               | Attributes of meat (expected)                | Overall liking (only evaluated) | ↑20%    | ↑7.53% |                         |
| Sage extract (SE) | 2.5 | E, 30 mg/kg | Slaughter traits                              | CW, CY                                       | NS                              | NS      | 28     | Loetscher et al. (2014) |
|                   |     |             |                                               | Sausage meat yield (/CW or /CY)              | NS                              | NS      |        |                         |
|                   |     |             |                                               |                                              |                                 |         |        |                         |
|                   |     |             | Lipid oxidation of abdominal fat and sausages | Induction time (IT)                          | NS                              | NS      |        |                         |
|                   |     |             |                                               |                                              |                                 |         |        |                         |
|                   |     |             |                                               |                                              |                                 |         |        |                         |
|                   |     |             |                                               | TBARS in raw sausage material (1, 4, 10 mon) | NS                              | NS      |        |                         |
|                   |     |             |                                               |                                              |                                 |         |        |                         |
|                   |     |             |                                               |                                              |                                 |         |        |                         |
|                   |     |             |                                               | TBARS in raw sausage material (7 mon)        | ↓21.4%                          | NS      |        |                         |
|                   |     |             |                                               |                                              |                                 |         |        |                         |
|                   |     |             |                                               | TBARS in spiced sausages (1, 4, 7 10 mon)    | NS                              | NS      |        |                         |
|                   |     |             |                                               |                                              |                                 |         |        |                         |
|                   |     |             | Microbial counts                              | Raw sausage material (1, 10 mon)             | NS                              | NS      |        |                         |
|                   |     |             |                                               | Spiced sausages (1, 10 mon)                  | NS                              | NS      |        |                         |

|           |            |                                       |                               |                    |                                |                                                                          |    |                         |
|-----------|------------|---------------------------------------|-------------------------------|--------------------|--------------------------------|--------------------------------------------------------------------------|----|-------------------------|
| Thyme oil | 0.01, 0.02 | E, 100 mg/kg (E100); 200 mg/kg (E200) | Carcass traits, organ weights | Hot CW             | ↓4.08% (0.01%)                 | E100: ↑3.85% (0.02%) E200: ↓4.66% (0.01%)                                | 42 | Bölükbaşı et al. (2006) |
|           |            |                                       |                               | Liver weight       | ↓6.98% (0.01%) ↓4.65% (0.02%)  | E100: NS E200: ↓13.04% (0.01%) ↓10.87% (0.02%)                           |    |                         |
|           |            |                                       |                               | Heart, breast, leg | NS                             | NS                                                                       |    |                         |
|           |            |                                       |                               | Wing               | ↓8.16% (0.01%)                 | E100: ↓2.17% (0.01%) ↑1.63 % (0.02%) E200: ↓6.74% (0.01%)                |    |                         |
|           |            |                                       |                               | Hot CY             | ↓2.6% (0.01%)                  | E100: ↑1.32% (0.02%) E200: ↓3.23% (0.01%)                                |    |                         |
|           |            |                                       | Lipid oxidation               | TBARS in leg (d 1) | ↓75.76% (0.01%) ↓88.9% (0.02%) | E100: ↑33.33% (0.01%) ↓38.89% (0.02%) E200: ↑50% (0.01%) ↓31.25% (0.02%) |    |                         |

|                    |                                    |                                                                                              |
|--------------------|------------------------------------|----------------------------------------------------------------------------------------------|
| TBARS in leg (d 3) | ↓77% (0.01%) ↓88% (0.02%)          | E100: ↑64.29% (0.01%)<br>↓14.29% (0.02%) E200:<br>↑35.3% (0.01%) ↓29.41%<br>(0.02%)          |
| TBARS in leg (d 7) | ↓95.43% (0.01%) ↓97.51%<br>(0.02%) | E100: ↑46.67% (0.01%)<br>↓20% (0.02%) E200:<br>↑22.2% (0.01%) ↓33.3%<br>(0.02%)              |
| TBARS in BM (d 1)  | ↓77.03% (0.01%) ↓86.49%<br>(0.02%) | E100: ↑88.89% (0.01%) ↑<br>11.11% (0.02%)<br>E200: E100: ↑88.89%<br>(0.01%) ↑ 11.11% (0.02%) |
| TBARS in BM (d 3)  | ↓77.63% (0.01%) ↓85.53%<br>(0.02%) | E100: ↓35.29% (0.02%)<br>E200: ↑88.89% (0.01%)<br>↑22.22% (0.02%)                            |
| TBARS in BM (d 7)  | ↓96.11% (0.01%) ↓97.41%<br>(0.02%) | E100: ↓25% (0.01%) ↓50%<br>(0.02%) E200: ↑50%<br>(0.01%)                                     |

|                   |             |                                  |                                                                                     |
|-------------------|-------------|----------------------------------|-------------------------------------------------------------------------------------|
| FA profile in leg | C14:0       | ↓3.59% (0.01%) ↓4.79% (0.02%)    | E100: ↓3.01% (0.01%)<br>↓4.22% (0.02%)<br>E200: ↓3.59% (0.01%)<br>↓4.79% (0.02%)    |
|                   | C16:0       | NS                               | NS                                                                                  |
|                   | C16:1       | ↑59.05% (0.01%) ↑138.36% (0.02%) | E100: ↑60.44% (0.01%)<br>↑140.44% (0.02%) E200: ↑59.74% (0.01%)<br>↑139.39% (0.02%) |
|                   | C18:0       | ↓10.37% (0.01%) ↓32.68% (0.02%)  | E100: ↓10.37% (0.01%)<br>↓32.68% (0.02%) E200: ↓10.2% (0.01%) ↓32.55% (0.02%)       |
|                   | C18:1 cis-9 | ↓5.33% (0.02%)                   | E100: ↓5.4% E200: ↓5.33% (0.02%)                                                    |

|            |                                    |                                                                                      |
|------------|------------------------------------|--------------------------------------------------------------------------------------|
| C18:2      | ↑8.77% (0.01%) ↑11.5% (0.02%)      | E100: ↑8.77% (0.01%)<br>↑11.5% (0.02%) E200:<br>↑8.81% (0.01%) ↑11.53%<br>(0.02%)    |
| C18:2n-6   | ↓57.14% (0.01%) ↓61.06%<br>(0.02%) | E100: ↓57.14% (0.01%)<br>↓61.06% (0.02%) E200:<br>↓57.14% (0.01%) ↓61.06%<br>(0.02%) |
| C20:4, ω-6 | ↓51.1% (0.01%) ↓48.35% (0.02%)     | E100: ↓50.93% (0.01%)<br>↓48.16% (0.02%) E200:<br>↓51.01% (0.01%) ↓48.25%<br>(0.02%) |
| SFA        | ↓2.53% (0.01%) ↓6.92% (0.02%)      | E100: ↓2.45% (0.01%)<br>↓6.85% (0.02%) E200:<br>↓2.49% (0.01%) ↓6.89%<br>(0.02%)     |



|                  |       |                                    |                                                                                      |
|------------------|-------|------------------------------------|--------------------------------------------------------------------------------------|
| FA profile in BM | MUFA  | ↑4.59% (0.01%) ↑6.1% (0.02%)       | E100: ↑4.59% (0.01%)<br>↑6.1% (0.02%)<br>E200: ↑4.63% (0.01%)<br>↑6.14% (0.02%)      |
|                  | PUFA  | ↓4.35% (0.01%) ↓2.18% (0.02%)      | E100: ↓4.31% (0.01%)<br>↓2.13% (0.02%) E200:<br>↓4.31% (0.01%) ↓2.13%<br>(0.02%)     |
|                  | UP    | NS                                 | NS                                                                                   |
|                  | C14:0 | ↓21.64% (0.01%) ↓34.21%<br>(0.02%) | E100: ↓21.41% (0.01%)<br>↓34.02% (0.02%) E200:<br>↓21.87% (0.01%) ↓34.40%<br>(0.02%) |
|                  | C16:0 | ↑4.3% (0.01%) ↑4.3% (0.02%)        | E100: ↑6.25% (0.01%)<br>↑6.25% (0.02%)<br>E200: ↑6.25% (0.01%)<br>↑6.25% (0.02%)     |

|             |                                  |                                                                                        |
|-------------|----------------------------------|----------------------------------------------------------------------------------------|
| C16:1       | ↑51.36% (0.01%) ↑131.36% (0.02%) | E100: ↑51.36% (0.01%)<br>↑131.36% (0.02%)<br>E200: ↑50.68% (0.01%)<br>↑130.32% (0.02%) |
| C18:0       | ↓6.54% (0.01%) ↓41.52% (0.02%)   | E100: ↓6.21% (0.01%)<br>↓4.31% (0.02%) E200:<br>↓6.21% (0.01%) ↓4.31% (0.02%)          |
| C18:1 cis-9 | ↑3.53% (0.01%) ↑6.57% (0.02%)    | E100: ↑3.57% (0.01%)<br>↑6.61% (0.02%) E200:<br>↑3.53% (0.01%) ↑2.93% (0.02%)          |
| C18:2       | ↑2.94% (0.01%) ↑9.40% (0.02%)    | E100: ↑2.91% (0.01%)<br>↑9.37% (0.02%) E200:<br>↑2.94% (0.01%) ↑9.40% (0.02%)          |

|          |                                 |                                                                                   |
|----------|---------------------------------|-----------------------------------------------------------------------------------|
| C18:2n-6 | ↓15.86% (0.01%) ↓12.41% (0.02%) | E100: ↓15.86% (0.01%)<br>↓12.41% (0.02%) E200:<br>↓15.28% (0.01%) ↓11.81% (0.02%) |
|----------|---------------------------------|-----------------------------------------------------------------------------------|

|            |                                 |                                                                                   |
|------------|---------------------------------|-----------------------------------------------------------------------------------|
| C20:4, ω-6 | ↓27.72% (0.01%) ↓49.75% (0.02%) | E100: ↓27.54% (0.01%)<br>↓49.63% (0.02%) E200:<br>↓27.45% (0.01%) ↓49.57% (0.02%) |
|------------|---------------------------------|-----------------------------------------------------------------------------------|

|     |                                |                                                                               |
|-----|--------------------------------|-------------------------------------------------------------------------------|
| SFA | ↓0.68% (0.01%) ↓10.04% (0.02%) | E100: ↓0.44% (0.01%)<br>↓9.82% (0.02%) E200:<br>↓0.36% (0.01%) ↓9.42% (0.02%) |
|-----|--------------------------------|-------------------------------------------------------------------------------|

|      |                                |                                                                                |
|------|--------------------------------|--------------------------------------------------------------------------------|
| MUFA | ↑5.47% (0.01%) ↑16.19% (0.02%) | E100: ↑5.5% (0.01%)<br>↑16.23% (0.02%) E200:<br>↑5.43% (0.01%) ↑16.15% (0.02%) |
|------|--------------------------------|--------------------------------------------------------------------------------|

|                        |                                          |                                                                                                      |                             |                   |                                                           |                                                                                 |                                      |
|------------------------|------------------------------------------|------------------------------------------------------------------------------------------------------|-----------------------------|-------------------|-----------------------------------------------------------|---------------------------------------------------------------------------------|--------------------------------------|
|                        |                                          |                                                                                                      |                             | PUFA              | ↓3.75% (0.01%) ↓2.99% (0.02%)                             | E100: ↓3.72% (0.01%)<br>↓2.97% (0.02%) E200:<br>↓3.65% (0.01%) ↓2.9%<br>(0.02%) |                                      |
|                        |                                          |                                                                                                      |                             | UP                | NS                                                        | NS                                                                              |                                      |
|                        |                                          | E, 100 mg/kg<br>(E100), 200<br>mg/kg, (E200)                                                         |                             |                   |                                                           |                                                                                 |                                      |
| Polyphenols<br>product | 0.01+100 mg/kg of<br>VitE (0.01E), 0.02, | 2 control, 1<br>negative<br>(without low<br>quality oil), 1<br>positive (with<br>low quality<br>oil) | Antioxidant status<br>in BM | Vitamin C         | NS                                                        | NS                                                                              | Mazur-<br>Kusnerek et al.<br>(2019b) |
|                        |                                          |                                                                                                      |                             | Retinol           | NO: ↓18.75% (0.02%) WO:<br>↑41.67% (0.01E)                | E100: ↓23.53% (0.02%)<br>E200: ↓18.75% (0.02%)                                  |                                      |
|                        |                                          |                                                                                                      |                             | Total tocopherols | NO: ↑287.1% (0.01E) =0.02% WO:<br>↑346.91% (0.01E) =0.02% | E100: ↓23.53% (0.02%)<br>E200: ↓37.4% (0.01E)<br>↓84.19% (0.02%)                |                                      |

|                                                  |                                                                                                                                                                                     |                                                                                                                                                   |
|--------------------------------------------------|-------------------------------------------------------------------------------------------------------------------------------------------------------------------------------------|---------------------------------------------------------------------------------------------------------------------------------------------------|
| Carcasse traits,<br>organ weights, pH<br>digesta | Total tocopherols                                                                                                                                                                   | NO: ↑287.1% (0.01E) =0.02%<br>↑346.91% (0.01E) =0.02%<br>WO: E100: ↓23.53% (0.02%)<br>E200: ↓37.4% (0.01E)<br>↓84.19% (0.02%)                     |
|                                                  | Vitamin EEq                                                                                                                                                                         | NO: ↑355.1% (0.01E) =0.02%<br>↑383.52% (0.01E) =0.02%<br>WO: E100: ↑15.47% (0.01E)<br>↓73.41% (0.02%) E200:<br>↓37.38% (0.01%) ↓85.58%<br>(0.02%) |
|                                                  | TBARS                                                                                                                                                                               | WO: ↓82.67% (0.01E)<br>NS                                                                                                                         |
| Carcasse traits,<br>organ weights, pH<br>digesta | Carcass dressing %                                                                                                                                                                  | NS<br>E100: ↑3.42% (0.02%)<br>P=0.064                                                                                                             |
|                                                  | BM content of carcass,<br>Heart content of BW,<br>Liver content of BW,<br>Abdominal fat content of<br>BW, Crop weight and<br>digesta pH,<br>Proventriculus weight and<br>digesta pH | NS<br>NS                                                                                                                                          |

|                                  |                                 |                                                                     |                                                         |
|----------------------------------|---------------------------------|---------------------------------------------------------------------|---------------------------------------------------------|
| Physicochemical properties of BM | Guizzard weight                 | NS                                                                  | E100: ↓15.61%                                           |
|                                  | Digesta pH                      | NS                                                                  | NS                                                      |
|                                  | Small intestine and ceca traits | NS                                                                  | NS                                                      |
|                                  | pH15                            | NO: ↑5.05% (0.01E) ↑3.75% (0.02%) WO: NS                            | NS                                                      |
|                                  | pH24                            | NS                                                                  | E200: ↓3.81% (0.01E) ↓2.65% (0.02%)                     |
|                                  | Colour                          |                                                                     |                                                         |
|                                  | L*                              | NO: ↑3.45% (0.01E) ↑4.97% (0.02%) WO: ↑3.66% (0.01E) ↑5.18% (0.02%) | E100: ↑4.13% (0.2%) E200: ↑3.84% (0.01E) ↑5.37% (0.02%) |
|                                  | a                               | NS                                                                  | NS                                                      |
|                                  | b                               | NS                                                                  | NS                                                      |
|                                  | Natural drip loss, WHC          | NS                                                                  | NS                                                      |
|                                  |                                 |                                                                     |                                                         |
| Dry matter, crude protein        |                                 | NS                                                                  | NS                                                      |
|                                  |                                 |                                                                     |                                                         |
| Crude fat                        |                                 | NO: ↑54.05% (0.02%)                                                 | NS                                                      |

|           |                  |                                          |                                              |
|-----------|------------------|------------------------------------------|----------------------------------------------|
| FAC of BM | Crude ash        | NO: ↑8.04% (0.01E) ↑9.82% (0.02%) WO: NS | NS                                           |
|           | SFAs             | NS                                       | NS                                           |
|           | MUFAs            | NO: ↑6.1% (0.01E) ↑8.77% (0.02%)         | NS                                           |
|           | PUFAs            | NO: ↓17.64% (0.02%) WO: ↑10.14% (0.01E)  | NS                                           |
|           | n-3, n-6/n-3     | NS                                       | NS                                           |
|           | DFA <sub>s</sub> | NO: ↓2.04% (0.02%) WO: ↑1.46% (0.01E)    | E100: ↓1.54% (0.02%)<br>E200: ↓1.71% (0.02%) |
|           | OFA <sub>s</sub> | WO: ↓5.21% (0.01E)                       | E100: ↑6.11% (0.02%)<br>E200: ↑6.85% (0.02%) |
|           | DFA/OFA          | NO: ↓9.56% (0.02%) WO: NS                | NS                                           |
|           | AI               | NO: ↑10.71% (0.02%) WO: ↓6.25% (0.01E)   | E100: ↑6.9% (0.02%) E200:                    |
|           | TI               | NS                                       | NS                                           |

|             |                                       |                                       |                          |                                                         |                                               |                                                                   |                               |
|-------------|---------------------------------------|---------------------------------------|--------------------------|---------------------------------------------------------|-----------------------------------------------|-------------------------------------------------------------------|-------------------------------|
|             |                                       |                                       | PI                       | NO: ↓36.13% (0.01E) ↓43.1% (0.02%) WO: NS               | NS                                            |                                                                   |                               |
| Polyphenols | 0.01+100 mg/kg of VitE (0.01E), 0.02, | E, 100 mg/kg (E100), 200 mg/kg (E200) |                          | 2 control, without (NG) or with grain (WG) contaminated |                                               | 35                                                                | Mazur-Kusnerek et al. (2019c) |
|             |                                       |                                       | Antioxidant status in BM | Vitamin C                                               | NG: ↓12.07% (0.01E) ↓23.52% (0.02%)           | E100: ↓12.97% (0.01E)<br>E200: ↓18.37% (0.01E)<br>↓29.01% (0.02%) |                               |
|             |                                       |                                       |                          | Retinol                                                 | NG: NS WG: ↑32.98% (0.01E)<br>↑68.09% (0.02%) | NS                                                                |                               |
|             |                                       |                                       |                          | Total tocopherols                                       | NG: ↑128.82% (0.01E) WG: ↑495.46% (0.01E)     | E100: ↓60.47% (0.02%)<br>E200: ↓30.32% (0.01E)<br>↓61.07% (0.02%) |                               |



|                                                                                   |                                                     |                                               |                                                                                     |
|-----------------------------------------------------------------------------------|-----------------------------------------------------|-----------------------------------------------|-------------------------------------------------------------------------------------|
| Carcass trait,<br>structure of the<br>gastrointestinal<br>tract and digesta<br>pH | Vitamin E equivalent                                | NG: ↑203.57% (0.01E) WG:<br>↑493.02% (0.01E)  | E100: ↓37.96% (0.01E)<br>↓65.69% (0.02%) E200:<br>↓38.7% (0.01E) ↓66.11%<br>(0.02%) |
|                                                                                   | TBARS                                               | NG: NS WG: ↓55.26% (0.01E)<br>↓42.63% (0.02%) | NS                                                                                  |
|                                                                                   | Carcass dressing                                    | NG: ↓2.57% (0.01E) ↓3.84%<br>(0.02%) WG: NS   | NS                                                                                  |
|                                                                                   | percentage                                          |                                               |                                                                                     |
|                                                                                   | Liver [%]                                           | NG: ↑26.97% (0.02%)                           | NS                                                                                  |
|                                                                                   | BM, heart, Abdominal fat                            | NS                                            | NS                                                                                  |
|                                                                                   | Crop, proventricolous,<br>gizzard weight, digest pH | NS                                            | NS                                                                                  |
|                                                                                   | Small intestine length                              | NG: ↑22.28% (0.01E) ↑24.17%<br>(0.02%)        | NS                                                                                  |

|                            |                                     |                      |
|----------------------------|-------------------------------------|----------------------|
| Small intestine weight     | NG: ↑20.65% (0.01E) ↑25.54% (0.02%) | E100: ↓9.76% (0.01E) |
| Small intestine digesta pH | NS                                  | NS                   |
| Caeca length               | WG: ↓13.25% (0.01E)                 | NS                   |
| Ceca weight, digesta pH    | NS                                  | NS                   |

---

Abbreviations: AI, atherogenicity index, BM, breast muscle; CY, carcass yield; CW, carcass weight; DPPH, 1,1-diphenyl-2-picrylhydrazyl radical scavenging activity; DFAs, neutral and hypocholesterolemic Fatty Acids; ENB, Enterobacteriaceae; FAC, fatty acid profile; HT, heat treated tissue; IL, ileotibalis muscle; LAB, lactic acid bacteria; MDA, malondialdehyde; MUFA, monounsaturated fatty acids; NS, not significant; OFAs, hypercholesterolemic fatty acids; ORACFL, antioxidant capacity  $\alpha$ -tocopherol content; PI, peroxidisability index; PM, pectoralis major (muscle); PSY, psychrophilic bacteria; PUFA, polyunsaturated fatty acids; RLE, relative length; RW, relative weight;; TBARs, thiobarbituric acid reactive substances; TI, thrombogenicity index, TM, thigh meat; TPC, total phenolic content; TVC, total viable counts (bacteria); UFA, unsaturated fatty acids; UP, unidentified peaks. (↑—increase; ↓—decrease).

Table S2. Effects of different plant feed additives on quantitative and qualitative traits of eggs production.

| Plant extract                                    | Dose extract               | Vitamin evaluated | Type of parameter                                                                                                                                 | Trait evaluated | Comparison to negative control: effect (plant product dose) | Comparison to positive control: effect (dose) | Period of study | Reference                |
|--------------------------------------------------|----------------------------|-------------------|---------------------------------------------------------------------------------------------------------------------------------------------------|-----------------|-------------------------------------------------------------|-----------------------------------------------|-----------------|--------------------------|
| Rosemary extract                                 | 0.05%, 0,1%                | E, 200 mg/kg      | Fatty acids composition of fresh eggs; Lipid oxidative stability of omega3-fatty acid (FA)-enriched eggs: Lipid hydroperoxides, TBARS             | FAC fresh eggs  | NS                                                          | NS                                            | 25 days         | (Galobart et al 2001)    |
|                                                  |                            |                   | Lipid oxidation markers lipid hydroperoxide, MDA; Fatty acid profile; $\alpha$ -tocoherol content, susceptibility to iron-induced lipid oxidation |                 | NS                                                          | NS                                            |                 |                          |
| Rosemary plant (RP), oregano (OP), saffron (SAF) | Respectively 0.5%,0.5%, 2% | E, 200 mg/kg      | Egg quality traits and production; Lipid oxidation (MDA)                                                                                          | Yolk colour     | NS                                                          | ↑7.84% (SAF)                                  | 56 d            | (Botsoglou et al., 2005) |

|               |                        |              |                                                                                  | Lipid oxidation (MDA)              | ↓ SAF>RP=OP<br>( <i>P</i> <0.05) | ↑ OP=RP=SAF ( <i>P</i> <0.05) |      |                              |
|---------------|------------------------|--------------|----------------------------------------------------------------------------------|------------------------------------|----------------------------------|-------------------------------|------|------------------------------|
| Rosemary (RP) | 0.5% (0.5RP), 1% (1RP) | E, 200 mg/kg | Egg production, egg quality traits. Lipid oxidation.                             | Lipid oxidation of eggs (MDA)      | ↓ 0.5RP>1RP                      | ↑ 0.5RP>1RP                   | 60 d | (Florou-Paneri et al., 2006) |
|               |                        |              |                                                                                  | Lipid oxidation of yolks           | ↓RP (0.5%)> RP(1%)               | ↑ 0.5RP>1RP                   |      |                              |
| Olive leaves  | 0.01                   | E, 200 mg/kg | Fatty acid composition, MDA in fresh and stored <i>n</i> -3 enriched eggs (60 d) | Only in stored eggs                |                                  |                               | 33 d | (Botsoglou et al., 2013)     |
|               |                        |              |                                                                                  | C18:1 oleic                        | ↓3.87%                           | NS                            |      |                              |
|               |                        |              |                                                                                  | C18:2 (n-6) linoleic               | ↑6.1%                            | NS                            |      |                              |
|               |                        |              |                                                                                  | C22:6 (n-3) DHA                    | ↑14.94%                          | NS                            |      |                              |
|               |                        |              |                                                                                  | MUFA                               | ↓4.1%                            | NS                            |      |                              |
|               |                        |              |                                                                                  | PUFA                               | ↑7.64%                           | NS                            |      |                              |
|               |                        |              |                                                                                  | n-6 PUFA                           | ↑5.77%                           | NS                            |      |                              |
|               |                        |              |                                                                                  | n-3 PUFA                           | ↑11.99%                          | NS                            |      |                              |
|               |                        |              |                                                                                  | Ratio n-6/n-3                      | ↓5.6%                            | NS                            |      |                              |
|               |                        |              |                                                                                  | Lipid hydroperoxide levels         | ↓ ( <i>P</i> <0.05)              | NS                            |      |                              |
|               |                        |              |                                                                                  | α-tocopherol in eggs stored (40 d) | ↑57.4%                           | NS                            |      |                              |

|                                                                          |                        |              |                                                                                                                                     |                                    |                                               |                                                   |          |                          |
|--------------------------------------------------------------------------|------------------------|--------------|-------------------------------------------------------------------------------------------------------------------------------------|------------------------------------|-----------------------------------------------|---------------------------------------------------|----------|--------------------------|
|                                                                          |                        |              |                                                                                                                                     | α-tocopherol in eggs stored (60 d) | NS                                            | ↓73.2%                                            |          |                          |
| <hr/>                                                                    |                        |              |                                                                                                                                     |                                    |                                               |                                                   |          |                          |
| Olive leaves                                                             | 0.5% (0.5OL), 1% (1OL) | E, 200 mg/kg | Lipid oxidation: lipid hydroperoxide, MDA; Fatty acid profile; α-tocopherol content, susceptibility to iron-induced lipid oxidation | Cumen hydroperoxides               | ↓88.96% (0.1OL)                               | ↑100.5 % (0.5OL)                                  | 33 d     | (Botsoglou et al., 2013) |
|                                                                          |                        |              |                                                                                                                                     | MDA after iron induced oxidation   | ↓1OL                                          | ↑0.5OL>1OL                                        |          |                          |
| <hr/>                                                                    |                        |              |                                                                                                                                     |                                    |                                               |                                                   |          |                          |
| Green tea (powder, GTP; extract, GTE; marigold (powder, MP; extract, ME) | 0.5, 1.5               | E, 200 mg/kg | Egg production, Egg quality, egg yolk cholesterol                                                                                   | Egg mass                           | NS                                            | ↓11.1% (MP)                                       | 12 weeks | (Ariana et al., 2011)    |
|                                                                          |                        |              |                                                                                                                                     | Yolk weight                        | NS                                            | ↓4.61% (GTE, GTP)                                 |          |                          |
|                                                                          |                        |              |                                                                                                                                     | CHOL/yolk                          | ↓2.67% (MP) ↓7.47% (ME) ↓6.1% (GTP) ↓8% (GTE) | ↑7.13% (MP) ↑1.85% (ME) ↑3.36% (GTP) ↑1.26% (GTE) |          |                          |



|                   |     |             |                |                                                                                        |    |    |    |                         |
|-------------------|-----|-------------|----------------|----------------------------------------------------------------------------------------|----|----|----|-------------------------|
| Sage extract (SE) | 2.5 | E, 30 mg/kg | Egg production | Number of eggs<br>produced/hen, g/egg, g/egg<br>per hen per d, g egg/g feed<br>intake2 | NS | NS | 28 | Loetscher et al. (2014) |
|-------------------|-----|-------------|----------------|----------------------------------------------------------------------------------------|----|----|----|-------------------------|

Abbreviations: CHOL, cholesterol; FAC, fatty acid composition; MDA, malondialdehyde; NS, not significant; PFA, plant feed additive; TBARs, thiobarbituric acid reactive substances. (↑—increase; ↓—decrease).
